# Supplementary material for: Comparative Transcriptome Analysis of Chemoreception Organs of Laodelphax striatellus in Response to Rice Stripe Virus Infection
Source: Int J Mol Sci. 2021 Sep 24;22(19):10299. doi: 10.3390/ijms221910299 (PMC8532003; doi:10.3390/ijms221910299)
Supplement: Supplementary file 1 [file ijms-22-10299-s001.zip › Table S1 and 2.xlsx]

## Sheet: Table S1
Table S1. Summary statistics of Illumina sequence data.
Sample	Total reads	Total read bases	GC	Q20	Q30	Total mapped reads	Unique mapped reads	Multi mapped reads	positive mapped reads	negative mapped reads	splice mapped reads	unsplice mapped reads	proper mapped reads
			(%)	(%)	(%)
viruliferous female antennae (VFA)	56067654	8.41G	39.06	96.1	90.33	32555224(58.06%)	31022126(55.33%)	1533098(2.73%)	15481558(27.61%)	15540568(27.72%)	11698769(20.87%)	19323357(34.46%)	26400670(47.09%)
Viruliferous female legs (VFL)	56681172	8.5G	42.17	95.88	90.03	33790030(59.61%)	32162799(56.74%)	1627231(2.87%)	15935095(28.11%)	16227704(28.63%)	13334235(23.52%)	18828564(33.22%)	27167602(47.93%)
viruliferous female heads (VFH)	46413646	6.96G	41.57	96.76	91.53	30943847(66.67%)	28726643(61.89%)	2217204(4.78%)	14342548(30.9%)	14384095(30.99%)	13574037(29.25%)	15152606(32.65%)	25039376(53.95%)
viruliferous male antennae (VMA)	54439934	8.17G	39.8	96.19	90.44	33135670(60.87%)	31540221(57.94%)	1595449(2.93%)	15744681(28.92%)	15795540(29.01%)	12495136(22.95%)	19045085(34.98%)	27254658(50.06%)
viruliferous male legs (VML)	56226104	8.43G	39.66	96.35	90.76	32654241(58.08%)	31126006(55.36%)	1528235(2.72%)	15512246(27.59%)	15613760(27.77%)	12491072(22.22%)	18634934(33.14%)	26735086(47.55%)
viruliferous male heads (VMH)	49190214	7.38G	40.56	96.55	91.07	31786510(64.62%)	30305339(61.61%)	1481171(3.01%)	15156706(30.81%)	15148633(30.8%)	13248339(26.93%)	17057000(34.68%)	26193112(53.25%)
Nonviruliferous female antennae (NFA)	53416908	8.01G	39.84	96.34	90.75	34120269(63.88%)	32477776(60.8%)	1642493(3.07%)	16205200(30.34%)	16272576(30.46%)	12941653(24.23%)	19536123(36.57%)	28208978(52.81%)
Nonviruliferous female legs (NFL)	56795966	8.52G	42.48	96.35	90.94	36915390(65.0%)	34903201(61.45%)	2012189(3.54%)	17333341(30.52%)	17569860(30.94%)	15105631(26.6%)	19797570(34.86%)	30316792(53.38%)
Nonviruliferous female heads (NFH)	61047374	9.16G	41.84	96.69	91.4	42085165(68.94%)	38732528(63.45%)	3352637(5.49%)	19361660(31.72%)	19370868(31.73%)	18834142(30.85%)	19898386(32.59%)	33861352(55.47%)
Nonviruliferous male antennae (NMA)	63492528	9.52G	39.46	96.31	90.75	39218798(61.77%)	37419923(58.94%)	1798875(2.83%)	18659797(29.39%)	18760126(29.55%)	14120933(22.24%)	23298990(36.7%)	32253802(50.8%)
Nonviruliferous male legs (NML)	51858094	7.78G	40.84	96.15	90.53	31875805(61.47%)	30380701(58.58%)	1495104(2.88%)	15092754(29.1%)	15287947(29.48%)	12332923(23.78%)	18047778(34.8%)	26140894(50.41%)
Nonviruliferous male heads (NMH)	58077654	8.71G	41.12	96.41	90.86	38671747(66.59%)	36884103(63.51%)	1787644(3.08%)	18448226(31.76%)	18435877(31.74%)	16776404(28.89%)	20107699(34.62%)	32019210(55.13%)

## Sheet: Table S2
Table S2. The primers used in this study.
Gene Name	Sense Primer	Anti-sense Primer
LstrActin	GTCTCACACACAGTCCCCATCTATG	TCGGTCAAGTCACGACCAGC
LstrOBP2	ACAGTAAACGGGCGATTCTC	TTCATCATCCATCACAGTCAGG
LstrOBP3	GCAAGGAACTAATATACCGATG	AAGCGATTGAACAGACAGG
LstrOBP9	GCTGTTGATGACCAAGGAATG	TGAGGATTGTAGTAACGGAAGTG
