# Supplementary figures and images for: Comparative Transcriptome Analysis of Chemoreception Organs of Laodelphax striatellus in Response to Rice Stripe Virus Infection
Source: MDPI journal article supplement (doi:10.3390/ijms221910299), 2021-09-24

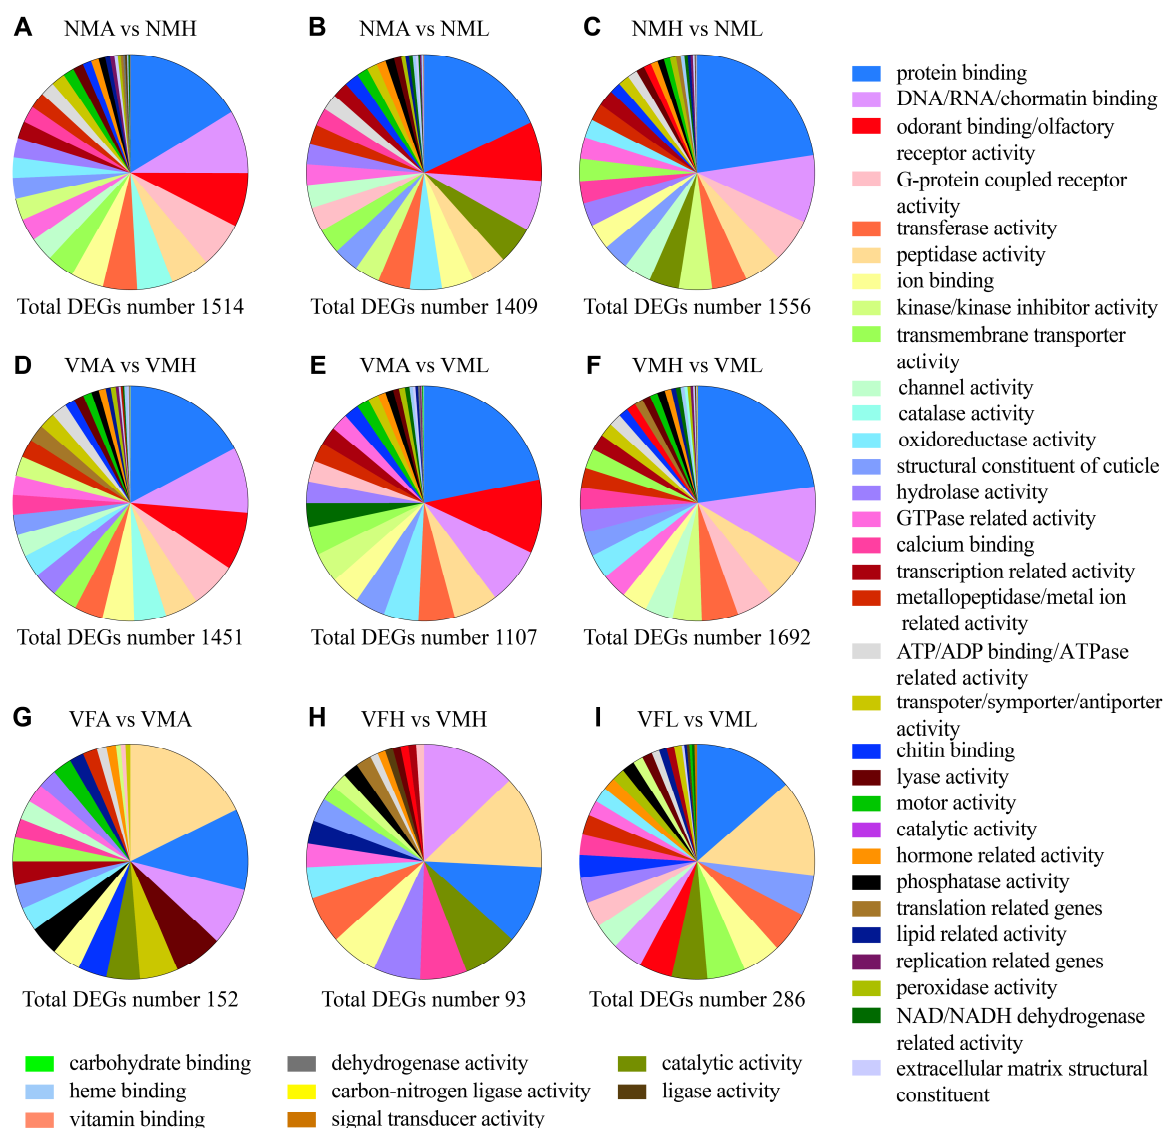

**Figure S1.** GO analysis of DEGs among male organs (or between female and male viruliferous organs).

Supplement: s1 [file s1]
